# Supplementary material
Source: PubMed Central journal article supplement (PMC2034240)
Supplement: pnas_0708286104_5.pdf [file pnas_0708286104_5.pdf]

**Table 2.** Histological classification of the 261 human lung cancer samples analyzed by array CGH in this study.

| <u>Sample type</u> | <u>Cancer cell line</u> | <u>Primary tumor</u>  |
|--------------------|-------------------------|-----------------------|
| NSCLC              |                         |                       |
| Adenocarcinoma     | 30                      | 93                    |
| Squamous           | 8                       | 53                    |
| Large cell         | 6                       | 7                     |
| Unknown subtype    | 6                       | 14                    |
| Carcinoid          | 2                       | 4                     |
| SCLC               | 25                      | 7                     |
| Unknown type       | 0                       | 6                     |
| <u>Total</u>       | <u>77</u>               | <u>184 (sum: 261)</u> |
