# Supplementary material
Source: PubMed Central journal article supplement (PMC2034240)
Supplement: pnas_0708286104_6.pdf [file pnas_0708286104_6.pdf]

**Table 3.** Description of human lung cancer cell lines for CGH study.

| Sample name | Source | Subtype    | Sample name | Source | Subtype    |
|-------------|--------|------------|-------------|--------|------------|
| 9812        | IH     | Large cell | NCI-H1838   | ATCC   | AC         |
| A427        | ATCC   | AC         | NCI-H187    | ATCC   | SCLC       |
| A549        | ATCC   | AC         | NCI-H196    | ATCC   | SCLC       |
| BEN         | DSMZ   | NSCLC      | NCI-H209    | ATCC   | SCLC       |
| CAL-12T     | DSMZ   | NSCLC      | NCI-H211    | ATCC   | SCLC       |
| CALU-1      | ATCC   | SCC        | NCI-H2122   | ATCC   | AC         |
| CALU-3      | IH     | AC         | NCI-H2126   | ATCC   | AC         |
| CHAGO-K-1   | DSMZ   | SCC        | NCI-H2170   | ATCC   | SCC        |
| COLO677     | DSMZ   | SCLC       | NCI-H2228   | ATCC   | AC         |
| CPC-N       | DSMZ   | SCLC       | NCI-H2347   | ATCC   | AC         |
| DMS114      | ATCC   | SCLC       | NCI-H292    | ATCC   | NSCLC      |
| DMS79       | ATCC   | SCLC       | NCI-H322    | ATCC   | AC         |
| DV-90       | DSMZ   | AC         | NCI-H345    | ATCC   | SCLC       |
| EPLC-272H   | DSMZ   | SCC        | NCI-H358    | ATCC   | AC         |
| NCI-H520    | ATCC   | SCC        | NCI-H417    | ATCC   | SCLC       |
| HCC15       | DSMZ   | SCC        | NCI-H441    | ATCC   | AC         |
| HCC366      | DSMZ   | AC         | NCI-H446    | ATCC   | SCLC       |
| HCC44       | DSMZ   | AC         | NCI-H460    | ATCC   | Large cell |
| HLC-1       | DSMZ   | AC         | NCI-H510A   | ATCC   | SCLC       |
| LCLC-103H   | DSMZ   | Large cell | NCI-H522    | ATCC   | AC         |
| LCLC-97TMI  | DSMZ   | Large cell | NCI-H526    | ATCC   | SCLC       |
| LOU-NH-91   | DSMZ   | SCC        | NCI-H596    | ATCC   | AC         |
| LXF-289     | DSMZ   | AC         | NCI-H647    | ATCC   | AC         |
| NCI-H1155   | ATCC   | NSCLC      | NCI-H661    | ATCC   | Large cell |
| NCI-H125    | ATCC   | AC         | NCI-H69     | ATCC   | SCLC       |
| NCI-H128    | ATCC   | SCLC       | NCI-H727    | ATCC   | Carcinoid  |
| NCI-H1299   | ATCC   | NSCLC      | NCI-H82     | ATCC   | SCLC       |
| NCI-H1395   | ATCC   | AC         | NCI-H820    | ATCC   | AC         |
| NCI-H1399   | ATCC   | SCLC       | NCI-H838    | ATCC   | AC         |
| NCI-H1437   | ATCC   | AC         | NCI-H889    | ATCC   | SCLC       |
| NCI-H146    | ATCC   | SCLC       | SCLC-21H    | DSMZ   | SCLC       |
| NCI-H1563   | ATCC   | AC         | SCLC-22H    | DSMZ   | SCLC       |
| NCI-H1568   | ATCC   | AC         | SKLC-13     | IH     | SCLC       |
| NCI-H157    | ATCC   | NSCLC      | SK-LC-17    | IH     | SCLC       |
| NCI-H1650   | ATCC   | AC         | SK-LC-3     | IH     | Large cell |
| NCI-H1688   | ATCC   | SCLC       | SKLU-1      | ATCC   | AC         |
| NCI-H1703   | ATCC   | AC         | SK-MES-1    | ATCC   | SCC        |
| NCI-H1792   | ATCC   | AC         | SW900       | ATCC   | SCLC       |
| UMC-11      | DSMZ   | Carcinoid  |             |        |            |

Sources: IH, our own in-house collection; ATCC, American Type Culture Collection ([www.atcc.org](http://www.atcc.org)); DSMZ, Deutsche Sammlung von Mikroorganismen und Zellkulturen GmbH ([www.dsmz.de/index.htm](http://www.dsmz.de/index.htm)). AC, adenocarcinoma; SCC, squamous cell carcinoma.
