# Supplementary material
Source: PubMed Central journal article supplement (PMC2034240)
Supplement: pnas_0708286104_7.pdf [file pnas_0708286104_7.pdf]

**Table 4.** Description of human primary lung tumors for CGH study.

| Sample name | Subtype | Sample name | Subtype    | Sample name | Subtype | Sample name | Subtype |
|-------------|---------|-------------|------------|-------------|---------|-------------|---------|
| 700         | ?       | 1585        | AC         | 1041        | AC      | 711         | SCC     |
| 739         | ?       | 1661        | AC         | 1046        | AC      | 724         | SCC     |
| 876         | ?       | 1715        | AC         | 1051        | AC      | 773         | SCC     |
| 1540        | ?       | 1729        | AC         | 1058        | AC      | 773         | SCC     |
| 1598        | ?       | 1798        | AC         | 1060        | AC      | 842         | SCC     |
| 1845        | ?       | 1811        | AC         | 1061        | AC      | 867         | SCC     |
| 385         | AC      | 1861        | AC         | 1065        | AC      | 869         | SCC     |
| 408         | AC      | 515         | Carcinoid  | 1077        | AC      | 871         | SCC     |
| 423         | AC      | 1095        | Carcinoid  | 1079        | AC      | 880         | SCC     |
| 433         | AC      | 1273        | Carcinoid  | 1083        | AC      | 882         | SCC     |
| 467         | AC      | 1913        | Carcinoid  | 1092        | AC      | 888         | SCC     |
| 488         | AC      | 694         | Large Cell | 1094        | AC      | 927         | SCC     |
| 492         | AC      | 790         | Large Cell | 1128        | AC      | 962         | SCC     |
| 494         | AC      | 1157        | Large Cell | 1146        | AC      | 979         | SCC     |
| 503         | AC      | 1460        | Large Cell | 1155        | AC      | 995         | SCC     |
| 531         | AC      | 1537        | Large Cell | 1167        | AC      | 999         | SCC     |
| 583         | AC      | 1724        | Large Cell | 1190        | AC      | 1034        | SCC     |
| 585         | AC      | 1798        | Large Cell | 1200        | AC      | 1062        | SCC     |
| 628         | AC      | 457         | NSCLC      | 1213        | AC      | 1063        | SCC     |
| 678         | AC      | 559         | NSCLC      | 1219        | AC      | 1064        | SCC     |
| 691         | AC      | 611         | NSCLC      | 1221        | AC      | 1071        | SCC     |
| 709         | AC      | 738         | NSCLC      | 1242        | AC      | 1076        | SCC     |
| 740         | AC      | 771         | NSCLC      | 1272        | AC      | 1105        | SCC     |
| 769         | AC      | 787         | NSCLC      | 1290        | AC      | 1136        | SCC     |
| 779         | AC      | 934         | NSCLC      | 1299        | AC      | 1162        | SCC     |
| 803         | AC      | 941         | NSCLC      | 1308        | AC      | 1193        | SCC     |
| 817         | AC      | 1093        | NSCLC      | 1317        | AC      | 1238        | SCC     |
| 820         | AC      | 1134        | NSCLC      | 1329        | AC      | 1248        | SCC     |
| 825         | AC      | 1174        | NSCLC      | 1341        | AC      | 1250        | SCC     |
| 841         | AC      | 1191        | NSCLC      | 1343        | AC      | 1262        | SCC     |
| 846         | AC      | 1461        | NSCLC      | 1352        | AC      | 1265        | SCC     |
| 917         | AC      | 1482        | NSCLC      | 1355        | AC      | 1286        | SCC     |
| 918         | AC      | 511         | SCLC       | 1370        | AC      | 1342        | SCC     |
| 920         | AC      | 1099        | SCLC       | 1375        | AC      | 1400        | SCC     |
| 922         | AC      | 1163        | SCLC       | 1390        | AC      | 1434        | SCC     |
| 933         | AC      | 1243        | SCLC       | 1418        | AC      | 1468        | SCC     |
| 942         | AC      | 1263        | SCLC       | 1419        | AC      | 1471        | SCC     |
| 945         | AC      | 1524        | SCLC       | 1443        | AC      | 1472        | SCC     |
| 948         | AC      | 1804        | SCLC       | 1446        | AC      | 1522        | SCC     |
| 961         | AC      | 269         | SCC        | 1470        | AC      | 1529        | SCC     |
| 975         | AC      | 533         | SCC        | 1489        | AC      | 1539        | SCC     |
| 998         | AC      | 541         | SCC        | 1490        | AC      | 1643        | SCC     |
| 1001        | AC      | 642         | SCC        | 1498        | AC      | 1661        | SCC     |
| 1016        | AC      | 647         | SCC        | 1536        | AC      | 1708        | SCC     |
| 1037        | AC      | 662         | SCC        | 1545        | AC      | 1747        | SCC     |
| 1040        | AC      | 694         | SCC        | 1555        | AC      | 1802        | SCC     |

Tumor sources: Cooperative Human Tissue Network, Eastern Division (Philadelphia, PA) and Cold Spring Harbor Laboratory in-house repository.
