# Supplementary material
Source: PubMed Central journal article supplement (PMC2034240)
Supplement: pnas_0708286104_8.pdf [file pnas_0708286104_8.pdf]

**Table 5.** Clinicopathological characteristics of an independent set of 91 lung adenocarcinomas with known status of 14q13.3 amplicon.

|                                                         |    |
|---------------------------------------------------------|----|
| High-level amplification at 14q13.3 <i>n</i>            | 17 |
| Low-level and wide chromosomal gain at 14q13.3 <i>n</i> | 12 |
| Gender <i>n</i>                                         |    |
| Male                                                    | 41 |
| Female                                                  | 50 |
| Stage <i>n</i>                                          |    |
| I                                                       | 53 |
| II                                                      | 20 |
| III                                                     | 18 |
| Tobacco use <i>n</i>                                    |    |
| Never smoker                                            | 17 |
| Smoker                                                  | 70 |
| Unknown status                                          | 4  |
| <i>KRAS</i> mutation status <i>n</i>                    |    |
| Mutant                                                  | 11 |
| Wild-type                                               | 80 |
| <i>EGFR</i> mutation status <i>n</i>                    |    |
| Mutant                                                  | 15 |
| Wild-type                                               | 76 |
| <i>TP53</i> mutation status <i>n</i>                    |    |
| Mutant                                                  | 25 |
| Wild-type                                               | 66 |
| Recurrence <i>n</i>                                     |    |
| Yes                                                     | 40 |
| No                                                      | 51 |
| Overall survival <i>n</i>                               |    |
| Alive                                                   | 64 |
| Dead                                                    | 27 |

Additional known parameters not listed: age, race, interval between surgery and recurrence, TNM index, patient status at most recent followup (classified into four groups: alive with disease, dead of disease, no evidence of disease, and dead of other causes), Ki67 index, tumor size, tumor grade, and caspase-3 activity index. Seventeen samples contain focal amplification at 14q13.3 (< 5 Mb). Additional 12 samples harbor low-level DNA gain at 14q13. Of the 17 samples with focal amplicon, eight were considered highly amplified (i.e., log<sub>2</sub> of segmented DNA copy number > 0.8). The averaged pack-year of smokers is 49.
