# Supplementary material
Source: PubMed Central journal article supplement (PMC2034240)
Supplement: pnas_0708286104_9.pdf [file pnas_0708286104_9.pdf]

**Table 7.** The 14q13.3 focal amplicon occurs preferentially in lung cancer.

| Cancer type              | Sample analyzed | Samples found amplified at 14q13.3 | Data source      |
|--------------------------|-----------------|------------------------------------|------------------|
| Melanoma                 | 47              | 0                                  | unpublished data |
| Colon                    | 128             | 0                                  | unpublished data |
| Breast                   | 271             | 0                                  | Hicks et al. (1) |
| Lung                     | 261             | 11                                 | this study       |
| Hepatocellular carcinoma | 70              | 0                                  | unpublished data |

Number of human cancer samples analyzed by the ROMA platform of array CGH at the Cold Spring Harbor Laboratory is indicated by cancer type. Amplification level cutoff was set at segment median value of 1.5. Only amplicons  $\leq 5$  Mb are reported in this table.
