# Supplementary material
Source: PubMed Central journal article supplement (PMC2034240)
Supplement: pnas_0708286104_10.pdf [file pnas_0708286104_10.pdf]

**Table 6.** Association of focal 14q13.3 amplification with disease progression.

| Clinicopathological Characteristics | <i>n</i> = 91 | 14q13.3 amplification status                     |                 |                                       |                 |
|-------------------------------------|---------------|--------------------------------------------------|-----------------|---------------------------------------|-----------------|
|                                     |               | Focal high-level Amplifications ( <i>n</i> = 17) |                 | Wide low-level Gains ( <i>n</i> = 12) |                 |
|                                     |               | Correlation coefficient                          | <i>p</i> -value | Correlation coefficient               | <i>p</i> -value |
| Stage                               |               |                                                  |                 |                                       |                 |
| III                                 | 18            | 0.257                                            | 0.013           | -0.031                                | 0.774           |
| I and II                            | 73            |                                                  |                 |                                       |                 |
| Recurrence                          |               |                                                  |                 |                                       |                 |
| Present                             | 40            | 0.200                                            | 0.056           | -0.083                                | 0.432           |
| No                                  | 51            |                                                  |                 |                                       |                 |

Associations were tested using a dataset consisting of 91 lung adenocarcinomas (SI-Table 4). Of these 91 samples, seventeen were found by CGH to harbor focal ( $\leq 5$  Mb) and high-level amplification ( $\log_2$  ratio  $\geq 0.8$ ) at 14q13.3. Twelve samples were found to contain wide and low-level DNA copy number gain at 14q13.3. Of the seventeen clinical parameters of this dataset, tumor stage was found to be significantly associated with the occurrence of focal high-level amplifications at 14q13.3. The presence of disease recurrence also associates with the occurrence of focal high-level amplifications but with less significance. These correlations were not found with tumors harboring wide low-level gains at 14q13.3.
