# Supplementary material
Source: PubMed Central journal article supplement (PMC2034240)

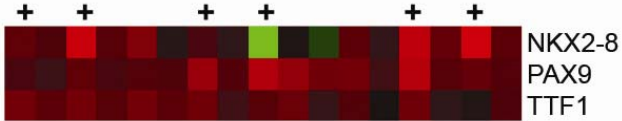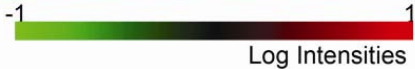

Supplement: pnas_0708286104_1.pdf [file pnas_0708286104_1.pdf]

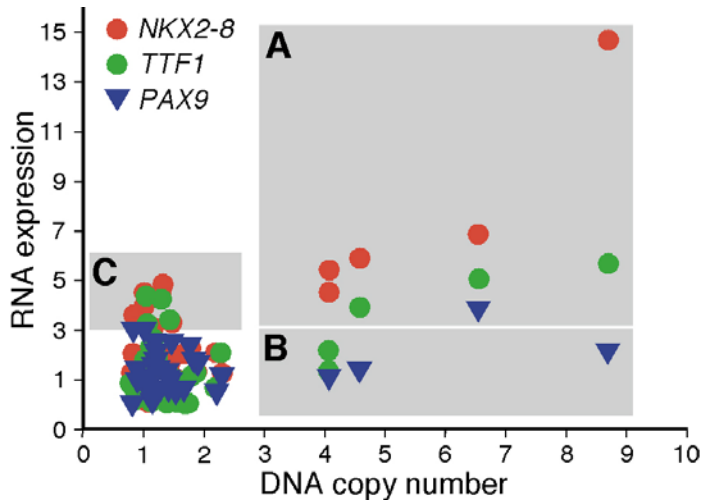

Supplement: pnas_0708286104_2.pdf [file pnas_0708286104_2.pdf]

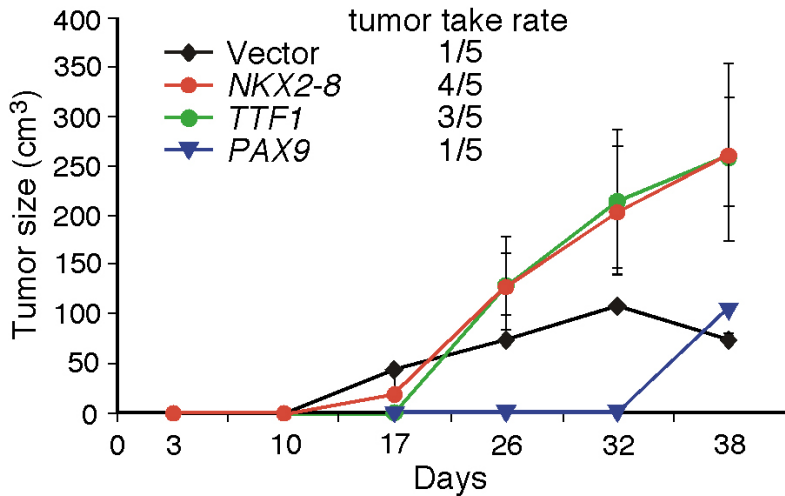

Supplement: pnas_0708286104_3.pdf [file pnas_0708286104_3.pdf]

**Growth**

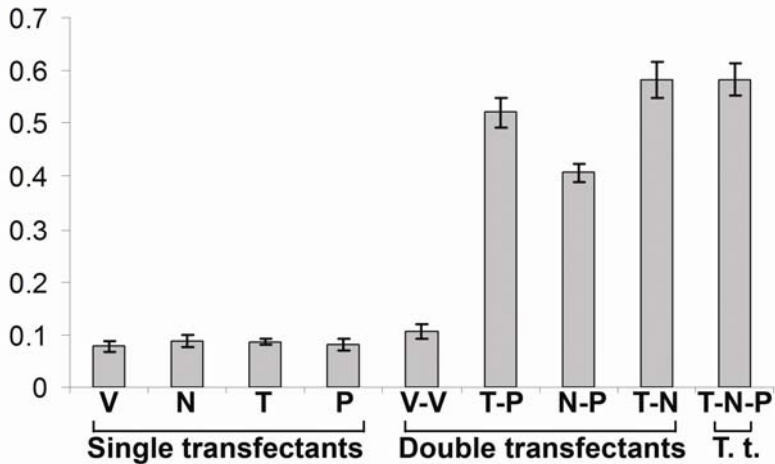

Supplement: pnas_0708286104_4.pdf [file pnas_0708286104_4.pdf]
